# Supplementary material for: Zinc (0) chemistry: does the missing 18-electron zinc tricarbonyl really exist?
Source: Royal Society of Chemistry journal article supplement (doi:10.1039/c003503c), 2010-01-01
Supplement: c003503c.pdf [file c003503c.pdf]

## Zinc (0) Chemistry: Does the missing 18-electron zinc tricarbonyl really exist?

Lin Jin, Li-juan Fu, and Yi-hong Ding\*

### Supporting Information

**Table S1:** Total energies (atomic units) of Zn(CO)<sub>3</sub> and transition state.

| Methods                                     | Zn(CO) <sub>3</sub> (D <sub>3h</sub> ) | TS(C <sub>3v</sub> ) | Zn(CO) <sub>3</sub> (D <sub>3h</sub> ) in Ar |
|---------------------------------------------|----------------------------------------|----------------------|----------------------------------------------|
| BP86/6-311+G(3df)                           | -2119.616834                           | -2119.616476         | -2119.617808                                 |
| B3PW91/6-311+G(3df)                         | -2119.191851                           | -2119.191762         | -2119.192856                                 |
| BPW91/6-311+G(3df)                          | -2119.508574                           | -2119.508157         | -2119.509534                                 |
| PBEPBE/6-311+G(3df)                         | -2118.71872                            | -2118.718134         | -2118.719686                                 |
| BH&HLYP/6-311+G(3df)                        | -2119.084838                           |                      | -2119.086064                                 |
| B3LYP/6-311+G(3df)                          | -2119.381275                           |                      | -2119.382413                                 |
| MP2/6-311+G(3df)                            | -2117.584458                           | -2117.583886         | -2117.584976                                 |
| MP4SDQ/6-311+G(3df)                         | -2117.5368996                          |                      | -2117.722378**                               |
| QCISD/6-311+G(3df)                          | -2117.521651                           |                      | -2117.70721**                                |
| CCSD/6-311+G(3df)                           | -2117.511513                           |                      | -2117.697063**                               |
| CASPT2(12,12)/6-31+G(d)                     | -2116.851367                           | -2116.85325          |                                              |
| CCSD(T)/aug-cc-pVTZ<br>//QCISD/6-311+G(3df) | -2117.782795                           |                      |                                              |

\*\* the single-point energies obtained at MP4SDQ/aug-cc-pVTZ//  
MP4SDQ/6-311+G(3df), QCISD/aug-cc-pVTZ// QCISD/6-311+G(3df) and  
CCSD/aug-cc-pVTZ// CCSD/6-311+G(3df) levels.

**Table S2:** Total H and G (atomic units) of Zn(CO)<sub>3</sub> at 7K.

| Methods              | H            | G            |
|----------------------|--------------|--------------|
| BP86/6-311+G(3df)    | -2119.595473 | -2119.595882 |
| B3PW91/6-311+G(3df)  | -2119.169728 | -2119.170137 |
| BPW91/6-311+G(3df)   | -2119.487192 | -2119.487601 |
| PBEPBE/6-311+G(3df)  | -2118.697312 | -2118.697721 |
| BH&HLYP/6-311+G(3df) | -2119.062157 | -2119.062566 |

|                     |              |              |
|---------------------|--------------|--------------|
| B3LYP/6-311+G(3df)  | -2119.359529 | -2119.359939 |
| MP2/6-311+G(3df)    | -2117.562793 | -2117.563201 |
| MP4SDQ/6-311+G(3df) | -2117.515216 | -2117.515625 |

**Table S3:** Total energies (atomic units) of the  $^3(\text{CO})\text{ZnZn}$ .

| Methods              | E            |
|----------------------|--------------|
| BP86/6-311+G(3df)    | -3672.429758 |
| B3PW91/6-311+G(3df)  | -3671.862867 |
| BPW91/6-311+G(3df)   | -3672.270993 |
| PBEPBE/6-311+G(3df)  | -3671.247542 |
| BH&HLYP/6-311+G(3df) | -3671.732852 |
| B3LYP/6-311+G(3df)   | -3671.99516  |
| MP2/6-311+G(3df)     | -3669.486509 |
| MP4SDQ/6-311+G(3df)  | -3669.416636 |
| QCISD/6-31+G(3df)    | -3669.400672 |
| CCSD/6-311+G(3df)    | -3669.393733 |

**Table S4:** Total energies (atomic units) of the  $^3(\text{CO})_2\text{ZnZn}$ .

| Methods              | E            |
|----------------------|--------------|
| BP86/6-311+G(3df)    | -3785.814631 |
| B3PW91/6-311+G(3df)  | -3785.19024  |
| BPW91/6-311+G(3df)   | -3785.64378  |
| PBEPBE/6-311+G(3df)  | -3784.509515 |
| BH&HLYP/6-311+G(3df) | -3785.044985 |
| B3LYP/6-311+G(3df)   | -3785.372186 |
| MP2/6-311+G(3df)     | -3782.645815 |
| MP4SDQ/6-311+G(3df)  | -3782.574111 |
| QCISD/6-311+G(3df)   | -3782.555313 |
| CCSD/6-311+G(3df)    | -3782.546157 |

**Table S5:** Total energies (atomic units) of the  $^3\text{Zn}(\text{CO})_3$ . The dissociated energies of

$E_1$  and  $E_2$  mean the energies of  $^3\text{Zn}(\text{CO})_3 \rightarrow ^3\text{Zn}+3\text{CO}$  and  $^3\text{Zn}(\text{CO})_3 \rightarrow ^3\text{Zn}(\text{CO})_2+\text{CO}$ ,

respectively

| Methods             | E            | $E_1$ | $E_2$ |
|---------------------|--------------|-------|-------|
| BP86/6-311+G(3df)   | -2119.599197 | 78.85 | 10.26 |
| B3PW91/6-311+G(3df) | -2119.177683 | 61.71 | 6.97  |
| BPW91/6-311+G(3df)  | -2119.492108 | 73.84 | 9.12  |

|                      |              |       |       |
|----------------------|--------------|-------|-------|
| PBEPBE/6-311+G(3df)  | -2118.701009 | 82.29 | 11.45 |
| BH&HLYP/6-311+G(3df) | -2119.075767 | 42.09 | 0.48  |
| B3LYP/6-311+G(3df)   | -2119.366804 | 58.90 | 5.98  |
| MP2/6-311+G(3df)     | -2117.551996 | 43.97 | -0.52 |
| MP4SDQ/6-311+G(3df)  | -2117.521758 | 37.78 | -1.76 |
| QCISD/6-311+G(d)     | -2117.233118 | 31.02 | -1.13 |
| CCSD/6-311+G(d)      | -2117.222903 | 30.33 | -1.14 |

**Table S6:** The dissociated energies of  $E_1$ ,  $E_2$ , and  $E_3$  mean the energies of  ${}^3(\text{CO})\text{ZnZn} \rightarrow {}^3\text{Zn}+{}^1\text{Zn}+\text{CO}$ ,  ${}^3(\text{CO})\text{ZnZn} \rightarrow {}^3\text{Zn}-\text{Zn}+\text{CO}$ , and  ${}^3(\text{CO})\text{ZnZn} \rightarrow {}^3\text{ZnCO}+{}^1\text{Zn}$ , respectively.

| Methods              | $E_1$ | $E_2$ | $E_3$ |
|----------------------|-------|-------|-------|
| BP86/6-311+G(3df)    | 61.56 | 22.99 | 17.09 |
| B3PW91/6-311+G(3df)  | 53.48 | 19.27 | 14.93 |
| BPW91/6-311+G(3df)   | 58.21 | 21.77 | 15.84 |
| PBEPBE/6-311+G(3df)  | 63.49 | 24.19 | 18.17 |
| BH&HLYP/6-311+G(3df) | 44.68 | 15.08 | 12.31 |
| B3LYP/6-311+G(3df)   | 51.63 | 18.19 | 13.24 |
| MP2/6-311+G(3df)     | 44.09 | 15.12 | 13.09 |
| MP4SDQ/6-311+G(3df)  | 40.96 | 12.59 | 11.46 |
| QCISD/6-311+G(3df)   | 39.85 | 11.78 | 10.70 |
| CCSD/6-311+G(3df)    | 39.03 | 11.28 | 10.41 |

**Table S7:** The dissociated energies of  $E_1$ ,  $E_2$ ,  $E_3$  and  $E_4$  mean the energies of  ${}^3(\text{CO})_2\text{ZnZn} \rightarrow {}^3\text{Zn}+{}^1\text{Zn}+2\text{CO}$ ,  ${}^3(\text{CO})_2\text{ZnZn} \rightarrow {}^3\text{Zn}-\text{Zn}+2\text{CO}$ ,  ${}^3(\text{CO})_2\text{ZnZn} \rightarrow {}^3\text{Zn}(\text{CO})_2+{}^1\text{Zn}$ , and  ${}^3(\text{CO})_2\text{ZnZn} \rightarrow {}^3(\text{CO})\text{ZnZn}+\text{CO}$  respectively.

| Methods              | $E_1$ | $E_2$ | $E_3$ | $E_4$ |
|----------------------|-------|-------|-------|-------|
| BP86/6-311+G(3df)    | 81.30 | 42.73 | 12.72 | 19.74 |
| B3PW91/6-311+G(3df)  | 67.98 | 33.77 | 13.25 | 14.50 |
| BPW91/6-311+G(3df)   | 76.64 | 40.19 | 11.92 | 18.43 |
| PBEPBE/6-311+G(3df)  | 84.48 | 45.18 | 13.64 | 20.99 |
| BH&HLYP/6-311+G(3df) | 52.82 | 23.23 | 11.22 | 8.15  |
| B3LYP/6-311+G(3df)   | 64.33 | 30.88 | 11.40 | 12.70 |
| MP2/6-311+G(3df)     | 58.25 | 29.28 | 13.76 | 14.16 |
| MP4SDQ/6-311+G(3df)  | 50.66 | 22.29 | 11.13 | 9.69  |
| QCISD/6-311+G(3df)   | 48.10 | 20.03 | 10.08 | 8.25  |
| CCSD/6-311+G(3df)    | 47.14 | 19.39 | 9.82  | 8.11  |

**Table S8:** The total and dissociated energies of  ${}^3(\text{CO})_2\text{ZnZnZn}$ .  $E_1$ ,  $E_2$ ,  $E_3$  and  $E_4$  mean the energies of  ${}^3(\text{CO})_2\text{ZnZnZn} \rightarrow {}^3\text{Zn}+2{}^1\text{Zn}+2\text{CO}$ ,  ${}^3(\text{CO})_2\text{ZnZnZn} \rightarrow {}^3\text{Zn}-\text{Zn}-\text{Zn}+2\text{CO}$ ,  ${}^3(\text{CO})_2\text{ZnZnZn} \rightarrow {}^3\text{Zn}(\text{CO})_2+{}^3\text{Zn}-\text{Zn}$ , and  ${}^3(\text{CO})_2\text{ZnZnZn} \rightarrow {}^3(\text{CO})_2\text{ZnZn} + {}^1\text{Zn}$ , respectively.

| Methods              | E            | $E_1$ | $E_2$ | $E_3$ | $E_4$ |
|----------------------|--------------|-------|-------|-------|-------|
| BP86/6-311+G(3df)    | -5565.390763 | 88.33 | 31.70 | 76.32 | 7.02  |
| B3PW91/6-311+G(3df)  | -5564.507365 | 74.45 | 24.86 | 73.51 | 6.47  |
| BPW91/6-311+G(3df)   | -5565.144781 | 83.15 | 29.86 | 73.88 | 6.51  |
| PBEPBE/6-311+G(3df)  | -5563.555987 | 92.60 | 34.38 | 76.09 | 8.12  |
| BH&HLYP/6-311+G(3df) | -5564.302793 | 56.93 | 15.63 | 73.59 | 4.11  |
| B3LYP/6-311+G(3df)   | -5564.732419 | 68.53 | 21.07 | 76.90 | 4.20  |
| MP2/6-311+G(2df)     | -5560.753185 | 63.11 | 23.62 | 18.23 | 5.86  |
| MP4SDQ/6-311+G(2df)  | -5560.657843 | 53.70 | 16.18 | 14.23 | 3.96  |
| QCISD/6-311+G(2df)   | -5560.629562 | 50.15 | 13.08 | 12.39 | 3.03  |
| CCSD/6-311+G(2df)    | -5560.617342 | 48.99 | 12.52 | 11.98 | 2.90  |

**Table S9:** Total energies (atomic units) and relative energies (in parentheses) of  ${}^1[\text{ZnH}_2]$  and  ${}^3[\text{ZnH}_2]$  systems.

| Species                        | B3LYP/6-311++G(3df,3pd) |
|--------------------------------|-------------------------|
| ${}^1\text{Zn}+\text{H}_2$     | -1780.533568(0.00)      |
| ${}^1\text{TS}$                | -1780.369496(102.96)    |
| ${}^1\text{HZnH}$              | -1780.522362(7.03)      |
| ${}^3\text{Zn}+\text{H}_2$     | -1780.382591(94.74)     |
| ${}^3\text{TS}$                | -1780.401842(82.66)     |
| ${}^3\text{Zn}\dots\text{H}_2$ | -1780.408101(78.73)     |
| ${}^3\text{HZnH}$              | -1780.401928(82.61)     |

### ${}^1\text{Zn}(\text{CO})_3 (\text{D}_{3h})$

|                     |   |           |           |          |
|---------------------|---|-----------|-----------|----------|
| BP86/6-311+G(3df)   |   |           |           |          |
| 30                  | 0 | 0.000000  | 0.000000  | 0.000000 |
| 6                   | 0 | 0.000000  | 1.888341  | 0.000000 |
| 8                   | 0 | 0.000000  | 3.044222  | 0.000000 |
| 6                   | 0 | 1.635351  | -0.944170 | 0.000000 |
| 8                   | 0 | 2.636373  | -1.522111 | 0.000000 |
| 6                   | 0 | -1.635351 | -0.944170 | 0.000000 |
| 8                   | 0 | -2.636373 | -1.522111 | 0.000000 |
| B3PW91/6-311+G(3df) |   |           |           |          |

|                        |   |           |           |          |
|------------------------|---|-----------|-----------|----------|
| 30                     | 0 | 0.000000  | 0.000000  | 0.000000 |
| 6                      | 0 | 0.000000  | 1.894496  | 0.000000 |
| 6                      | 0 | 1.640682  | -0.947248 | 0.000000 |
| 6                      | 0 | -1.640682 | -0.947248 | 0.000000 |
| 8                      | 0 | 0.000000  | 3.035257  | 0.000000 |
| 8                      | 0 | 2.628610  | -1.517628 | 0.000000 |
| 8                      | 0 | -2.628610 | -1.517628 | 0.000000 |
| BPW91/6-311+G(3df)     |   |           |           |          |
| 30                     | 0 | 0.000000  | 0.000000  | 0.000000 |
| 6                      | 0 | 0.000000  | 1.889268  | 0.000000 |
| 6                      | 0 | 1.636154  | -0.944634 | 0.000000 |
| 6                      | 0 | -1.636154 | -0.944634 | 0.000000 |
| 8                      | 0 | 0.000000  | 3.044344  | 0.000000 |
| 8                      | 0 | 2.636479  | -1.522172 | 0.000000 |
| 8                      | 0 | -2.636479 | -1.522172 | 0.000000 |
| PBEPBE/6-311+G(3df)    |   |           |           |          |
| 30                     | 0 | 0.000000  | 0.000000  | 0.000000 |
| 6                      | 0 | 0.000000  | 1.888368  | 0.000000 |
| 6                      | 0 | 1.635374  | -0.944184 | 0.000000 |
| 6                      | 0 | -1.635374 | -0.944184 | 0.000000 |
| 8                      | 0 | 0.000000  | 3.043706  | 0.000000 |
| 8                      | 0 | 2.635927  | -1.521853 | 0.000000 |
| 8                      | 0 | -2.635927 | -1.521853 | 0.000000 |
| BHandHLYP/6-311+G(3df) |   |           |           |          |
| 30                     | 0 | 0.000000  | 0.000000  | 0.000000 |
| 6                      | 0 | 0.000000  | 1.920420  | 0.000000 |
| 6                      | 0 | 1.663132  | -0.960210 | 0.000000 |
| 6                      | 0 | -1.663132 | -0.960210 | 0.000000 |
| 8                      | 0 | 0.000000  | 3.044815  | 0.000000 |
| 8                      | 0 | 2.636887  | -1.522407 | 0.000000 |
| 8                      | 0 | -2.636887 | -1.522407 | 0.000000 |
| B3LYP/6-311+G(3df)     |   |           |           |          |
| 30                     | 0 | 0.000000  | 0.000000  | 0.000000 |
| 6                      | 0 | 0.000000  | 1.907768  | 0.000000 |
| 8                      | 0 | 0.000000  | 3.049188  | 0.000000 |
| 6                      | 0 | 1.652176  | -0.953884 | 0.000000 |
| 8                      | 0 | 2.640674  | -1.524594 | 0.000000 |
| 6                      | 0 | -1.652176 | -0.953884 | 0.000000 |
| 8                      | 0 | -2.640674 | -1.524594 | 0.000000 |
| MP2/6-311+G(3df)       |   |           |           |          |
| 30                     | 0 | 0.000000  | 0.000000  | 0.000000 |
| 6                      | 0 | 0.000000  | 1.864157  | 0.000000 |
| 8                      | 0 | 0.000000  | 3.016620  | 0.000000 |
| 6                      | 0 | 1.614408  | -0.932079 | 0.000000 |
| 8                      | 0 | 2.612470  | -1.508310 | 0.000000 |
| 6                      | 0 | -1.614408 | -0.932079 | 0.000000 |
| 8                      | 0 | -2.612470 | -1.508310 | 0.000000 |
| MP4SDQ/6-311+G(3df)    |   |           |           |          |
| 30                     | 0 | 0.000000  | 0.000000  | 0.000000 |
| 6                      | 0 | 0.000000  | 1.892133  | 0.000000 |

|                          |   |           |           |           |
|--------------------------|---|-----------|-----------|-----------|
| 8                        | 0 | 0.000000  | 3.034101  | 0.000000  |
| 6                        | 0 | 1.638636  | -0.946067 | 0.000000  |
| 8                        | 0 | 2.627609  | -1.517051 | 0.000000  |
| 6                        | 0 | -1.638636 | -0.946067 | 0.000000  |
| 8                        | 0 | -2.627609 | -1.517051 | 0.000000  |
| QCISD/6-311+G(3df)       |   |           |           |           |
| 30                       | 0 | 0.000000  | 0.000000  | 0.000000  |
| 6                        | 0 | 0.000000  | 0.000000  | 1.909321  |
| 8                        | 0 | 0.000000  | 0.000000  | 3.048864  |
| 6                        | 0 | 1.653520  | 0.000000  | -0.954660 |
| 8                        | 0 | 2.640394  | 0.000000  | -1.524432 |
| 6                        | 0 | -1.653520 | 0.000000  | -0.954660 |
| 8                        | 0 | -2.640394 | 0.000000  | -1.524432 |
| CCSD/6-311+G(3df)        |   |           |           |           |
| 30                       | 0 | 0.000000  | 0.000000  | 0.000000  |
| 6                        | 0 | 1.912775  | 0.000000  | 0.000000  |
| 8                        | 0 | 3.049568  | 0.000000  | 0.000000  |
| 6                        | 0 | -0.956388 | -1.656512 | 0.000000  |
| 8                        | 0 | -1.524784 | -2.641003 | 0.000000  |
| 6                        | 0 | -0.956388 | 1.656512  | 0.000000  |
| 8                        | 0 | -1.524784 | 2.641003  | 0.000000  |
| CASSCF(12, 12)/6-31+G(d) |   |           |           |           |
| 30                       | 0 | 0.000000  | 0.000000  | 0.000000  |
| 6                        | 0 | 0.000000  | 1.956833  | 0.000000  |
| 6                        | 0 | 1.694667  | -0.978416 | 0.000000  |
| 6                        | 0 | -1.694667 | -0.978416 | 0.000000  |
| 8                        | 0 | 0.000000  | 3.076564  | 0.000000  |
| 8                        | 0 | 2.664383  | -1.538282 | 0.000000  |
| 8                        | 0 | -2.664383 | -1.538282 | 0.000000  |

### $^1\text{Zn}(\text{CO})_3 (\text{D}_{3h})$ in Ar solvent

|                     |   |           |           |          |
|---------------------|---|-----------|-----------|----------|
| BP86/6-311+G(3df)   |   |           |           |          |
| 30                  | 0 | 0.000000  | 0.000000  | 0.000000 |
| 6                   | 0 | 0.000000  | 1.889013  | 0.000000 |
| 8                   | 0 | 0.000000  | 3.045075  | 0.000000 |
| 6                   | 0 | 1.635933  | -0.944506 | 0.000000 |
| 8                   | 0 | 2.637112  | -1.522537 | 0.000000 |
| 6                   | 0 | -1.635933 | -0.944506 | 0.000000 |
| 8                   | 0 | -2.637112 | -1.522537 | 0.000000 |
| B3PW91/6-311+G(3df) |   |           |           |          |
| 30                  | 0 | 0.000000  | 0.000000  | 0.000000 |
| 6                   | 0 | 0.000000  | 1.895614  | 0.000000 |
| 6                   | 0 | 1.641650  | -0.947807 | 0.000000 |
| 6                   | 0 | -1.641650 | -0.947807 | 0.000000 |
| 8                   | 0 | -0.000216 | 3.036609  | 0.000000 |
| 8                   | 0 | 2.629888  | -1.518118 | 0.000000 |
| 8                   | 0 | -2.629673 | -1.518491 | 0.000000 |
| BPW91/6-311+G(3df)  |   |           |           |          |
| 30                  | 0 | 0.000000  | 0.000000  | 0.000000 |

|                                                                   |   |           |           |          |
|-------------------------------------------------------------------|---|-----------|-----------|----------|
| 6                                                                 | 0 | 0.000000  | 1.889408  | 0.000000 |
| 6                                                                 | 0 | 1.636276  | -0.944704 | 0.000000 |
| 6                                                                 | 0 | -1.636276 | -0.944704 | 0.000000 |
| 8                                                                 | 0 | 0.000000  | 3.044848  | 0.000000 |
| 8                                                                 | 0 | 2.636916  | -1.522424 | 0.000000 |
| 8                                                                 | 0 | -2.636916 | -1.522424 | 0.000000 |
| PBEPBE/6-311+G(3df)                                               |   |           |           |          |
| 30                                                                | 0 | 0.000000  | 0.000000  | 0.000000 |
| 6                                                                 | 0 | 0.000000  | 1.889113  | 0.000000 |
| 6                                                                 | 0 | 1.636020  | -0.944556 | 0.000000 |
| 6                                                                 | 0 | -1.636020 | -0.944556 | 0.000000 |
| 8                                                                 | 0 | 0.000000  | 3.044748  | 0.000000 |
| 8                                                                 | 0 | 2.636830  | -1.522374 | 0.000000 |
| 8                                                                 | 0 | -2.636830 | -1.522374 | 0.000000 |
| BHandHLYP/6-311+G(3df)                                            |   |           |           |          |
| 30                                                                | 0 | 0.000000  | 0.000000  | 0.000000 |
| 6                                                                 | 0 | 0.000000  | 1.921694  | 0.000000 |
| 6                                                                 | 0 | 1.664236  | -0.960847 | 0.000000 |
| 6                                                                 | 0 | -1.664236 | -0.960847 | 0.000000 |
| 8                                                                 | 0 | 0.000000  | 3.046418  | 0.000000 |
| 8                                                                 | 0 | 2.638276  | -1.523209 | 0.000000 |
| 8                                                                 | 0 | -2.638276 | -1.523209 | 0.000000 |
| B3LYP/6-311+G(3df)                                                |   |           |           |          |
| 30                                                                | 0 | 0.000000  | 0.000000  | 0.000000 |
| 6                                                                 | 0 | 0.000000  | 1.909208  | 0.000000 |
| 6                                                                 | 0 | 1.653423  | -0.954604 | 0.000000 |
| 6                                                                 | 0 | -1.653423 | -0.954604 | 0.000000 |
| 8                                                                 | 0 | -0.000385 | 3.051018  | 0.000000 |
| 8                                                                 | 0 | 2.642451  | -1.525175 | 0.000000 |
| 8                                                                 | 0 | -2.642066 | -1.525843 | 0.000000 |
| MP2/6-311+G(3df)                                                  |   |           |           |          |
| 30                                                                | 0 | 0.000000  | 0.000000  | 0.000000 |
| 6                                                                 | 0 | 0.000000  | 1.864157  | 0.000000 |
| 8                                                                 | 0 | 0.000000  | 3.016620  | 0.000000 |
| 6                                                                 | 0 | 1.614407  | -0.932079 | 0.000000 |
| 8                                                                 | 0 | 2.612470  | -1.508310 | 0.000000 |
| 6                                                                 | 0 | -1.614407 | -0.932079 | 0.000000 |
| 8                                                                 | 0 | -2.612470 | -1.508310 | 0.000000 |
| <b><math>^1\text{Zn}(\text{CO})_3\text{Ne}(\text{C}_s)</math></b> |   |           |           |          |
| BP86/6-31+G(d)                                                    |   |           |           |          |
| 30                                                                | 0 | 0.000000  | 0.693029  | 0.000000 |
| 6                                                                 | 0 | 1.654576  | -0.217822 | 0.000000 |
| 6                                                                 | 0 | -0.040197 | 2.581223  | 0.000000 |
| 6                                                                 | 0 | -1.614965 | -0.286706 | 0.000000 |
| 8                                                                 | 0 | -0.065072 | 3.748912  | 0.000000 |
| 8                                                                 | 0 | 2.677784  | -0.780943 | 0.000000 |
| 8                                                                 | 0 | -2.613679 | -0.892190 | 0.000000 |
| 10                                                                | 0 | 0.001126  | -4.985728 | 0.000000 |

### TS (C<sub>3v</sub>)

#### BP86/6-311+G(3df)

|    |   |           |           |           |
|----|---|-----------|-----------|-----------|
| 30 | 0 | -0.000128 | -0.000097 | 0.203343  |
| 6  | 0 | -1.878115 | -0.155652 | -0.156733 |
| 6  | 0 | 0.804142  | 1.704321  | -0.156592 |
| 6  | 0 | 1.074158  | -1.548344 | -0.156496 |
| 8  | 0 | -3.028849 | -0.251270 | -0.137101 |
| 8  | 0 | 1.296975  | 2.748557  | -0.136895 |
| 8  | 0 | 1.732215  | -2.497168 | -0.136172 |

#### B3PW91/6-311+G(3df)

|    |   |           |           |          |
|----|---|-----------|-----------|----------|
| 30 | 0 | -.001243  | -.000051  | .147066  |
| 6  | 0 | -1.889105 | -.104765  | -.094899 |
| 6  | 0 | 0.854278  | 1.686198  | -.094692 |
| 6  | 0 | 1.035730  | -1.581713 | -.094355 |
| 8  | 0 | -3.027443 | -.168407  | -.113200 |
| 8  | 0 | 1.369497  | 2.703256  | -.112892 |
| 8  | 0 | 1.661928  | -2.534448 | -.112447 |

#### BPW91/6-311+G(3df)

|    |   |           |           |          |
|----|---|-----------|-----------|----------|
| 30 | 0 | .000199   | -.000026  | .211301  |
| 6  | 0 | 1.815259  | -.510876  | -.165780 |
| 6  | 0 | -1.350189 | -1.316676 | -.165165 |
| 6  | 0 | -.465360  | 1.827437  | -.165617 |
| 8  | 0 | 2.925726  | -.823645  | -.140285 |
| 8  | 0 | -2.176568 | -2.121686 | -.139896 |
| 8  | 0 | -.749687  | 2.945513  | -.139777 |

#### PBEPBE/6-311+G(3df)

|    |   |           |           |           |
|----|---|-----------|-----------|-----------|
| 30 | 0 | 0.000416  | -0.000377 | 0.242059  |
| 6  | 0 | -0.400732 | 1.838064  | -0.184811 |
| 6  | 0 | 1.792808  | -0.571775 | -0.185125 |
| 6  | 0 | -1.392323 | -1.265794 | -0.184807 |
| 8  | 0 | -0.647664 | 2.965149  | -0.163763 |
| 8  | 0 | 2.892201  | -0.921983 | -0.164101 |
| 8  | 0 | -2.245912 | -2.042123 | -0.163798 |

#### MP2/6-311+G(3df)

|    |   |           |           |           |
|----|---|-----------|-----------|-----------|
| 30 | 0 | -0.000098 | -0.000082 | 0.274480  |
| 6  | 0 | 0.528804  | 1.768693  | -0.147015 |
| 6  | 0 | 1.267467  | -1.342303 | -0.147028 |
| 6  | 0 | -1.796333 | -0.426442 | -0.147044 |
| 8  | 0 | 0.857912  | 2.868340  | -0.232788 |
| 8  | 0 | 2.055697  | -2.176703 | -0.232825 |
| 8  | 0 | -2.913195 | -0.691289 | -0.232870 |

#### CASSCF(12,12)/6-31+G(d)

|    |   |           |           |           |
|----|---|-----------|-----------|-----------|
| 30 | 0 | 0.000000  | 0.000000  | 0.004006  |
| 6  | 0 | 0.000000  | 1.995246  | -0.002960 |
| 6  | 0 | 1.727934  | -0.997623 | -0.002960 |
| 6  | 0 | -1.727934 | -0.997623 | -0.002960 |
| 8  | 0 | 0.000000  | 3.127588  | -0.002788 |
| 8  | 0 | 2.708571  | -1.563794 | -0.002788 |



|                                                                         |   |           |           |           |
|-------------------------------------------------------------------------|---|-----------|-----------|-----------|
| 8                                                                       | 0 | -2.708571 | -1.563794 | -0.002788 |
| <b><math>^3(\text{CO})\text{ZnZn}(\text{C}_{\infty\text{v}})</math></b> |   |           |           |           |
| BP86/6-311+G(3df)                                                       |   |           |           |           |
| 30                                                                      | 0 | -0.497286 | -0.141846 | 0.002499  |
| 30                                                                      | 0 | 1.939934  | 0.069289  | -0.002165 |
| 6                                                                       | 0 | -2.429572 | 0.239000  | 0.018318  |
| 8                                                                       | 0 | -3.587751 | 0.092838  | -0.014992 |
| B3PW91/6-311+G(3df)                                                     |   |           |           |           |
| 30                                                                      | 0 | -0.007105 | -1.976006 | 0.000000  |
| 30                                                                      | 0 | 0.000000  | 0.509864  | 0.000000  |
| 6                                                                       | 0 | 0.012141  | 2.482132  | 0.000000  |
| 8                                                                       | 0 | 0.017539  | 3.636431  | 0.000000  |
| BPW91/6-311+G(3df)                                                      |   |           |           |           |
| 30                                                                      | 0 | -0.008183 | -1.973577 | 0.000000  |
| 30                                                                      | 0 | 0.000000  | 0.502442  | 0.000000  |
| 6                                                                       | 0 | 0.014552  | 2.486289  | 0.000000  |
| 8                                                                       | 0 | 0.019771  | 3.652037  | 0.000000  |
| PBEPBE/6-311+G(3df)                                                     |   |           |           |           |
| 30                                                                      | 0 | -0.008292 | -1.973317 | 0.000000  |
| 30                                                                      | 0 | 0.000000  | 0.503060  | 0.000000  |
| 6                                                                       | 0 | 0.014825  | 2.484284  | 0.000000  |
| 8                                                                       | 0 | 0.019976  | 3.650251  | 0.000000  |
| BHandHLYP/6-311+G(3df)                                                  |   |           |           |           |
| 30                                                                      | 0 | 0.000000  | 0.000000  | 2.003901  |
| 30                                                                      | 0 | 0.000000  | 0.000000  | -0.529103 |
| 6                                                                       | 0 | 0.000000  | 0.000000  | -2.506698 |
| 8                                                                       | 0 | 0.000000  | 0.000000  | -3.650470 |
| B3LYP/6-311+G(3df)                                                      |   |           |           |           |
| 30                                                                      | 0 | 0.000000  | 0.000000  | 1.997144  |
| 30                                                                      | 0 | 0.000000  | 0.000000  | -0.518143 |
| 6                                                                       | 0 | 0.000000  | 0.000000  | -2.508641 |
| 8                                                                       | 0 | 0.000000  | 0.000000  | -3.664774 |
| MP2/6-311+G(3df)                                                        |   |           |           |           |
| 30                                                                      | 0 | 0.000000  | 0.000000  | 1.928892  |
| 30                                                                      | 0 | 0.000000  | 0.000000  | -0.487175 |
| 6                                                                       | 0 | 0.000000  | 0.000000  | -2.428846 |
| 8                                                                       | 0 | 0.000000  | 0.000000  | -3.584806 |
| MP4SDQ/6-311+G(3df)                                                     |   |           |           |           |
| 30                                                                      | 0 | 0.000000  | 0.000000  | 1.961344  |
| 30                                                                      | 0 | 0.000000  | 0.000000  | -0.505637 |
| 6                                                                       | 0 | 0.000000  | 0.000000  | -2.459115 |
| 8                                                                       | 0 | 0.000000  | 0.000000  | -3.614567 |
| QCISD/6-311+G(3df)                                                      |   |           |           |           |
| 30                                                                      | 0 | 0.000000  | 0.000000  | 1.981863  |
| 30                                                                      | 0 | 0.000000  | 0.000000  | -0.515944 |
| 6                                                                       | 0 | 0.000000  | 0.000000  | -2.479178 |
| 8                                                                       | 0 | 0.000000  | 0.000000  | -3.637814 |
| CCSD/6-311+G(3df)                                                       |   |           |           |           |

|    |   |          |          |           |
|----|---|----------|----------|-----------|
| 30 | 0 | 0.000000 | 0.000000 | 1.985369  |
| 30 | 0 | 0.000000 | 0.000000 | -0.517986 |
| 6  | 0 | 0.000000 | 0.000000 | -2.484435 |
| 8  | 0 | 0.000000 | 0.000000 | -3.639359 |

${}^3(\text{CO})_2\text{ZnZn} (\text{C}_{2v})$

BP86/6-311+G(3df)

|    |   |           |           |           |
|----|---|-----------|-----------|-----------|
| 30 | 0 | 0.409546  | -0.000004 | 0.000037  |
| 6  | 0 | 1.565327  | 1.584739  | 0.000073  |
| 6  | 0 | 1.565530  | -1.584596 | 0.000074  |
| 8  | 0 | 1.981405  | 2.664912  | 0.000199  |
| 8  | 0 | 1.981748  | -2.664715 | 0.000200  |
| 30 | 0 | -2.092558 | -0.000077 | -0.000172 |

B3PW91/6-311+G(3df)

|    |   |           |           |           |
|----|---|-----------|-----------|-----------|
| 30 | 0 | 0.335748  | -0.000030 | 0.000050  |
| 6  | 0 | 1.648164  | 1.505170  | 0.000053  |
| 6  | 0 | 1.648416  | -1.505002 | 0.000055  |
| 8  | 0 | 2.198820  | 2.503950  | 0.000223  |
| 8  | 0 | 2.199253  | -2.503682 | 0.000224  |
| 30 | 0 | -2.167883 | -0.000075 | -0.000191 |

BPW91/6-311+G(3df)

|    |   |           |           |           |
|----|---|-----------|-----------|-----------|
| 30 | 0 | 0.408714  | -0.000005 | 0.000025  |
| 6  | 0 | 1.567966  | 1.584661  | 0.000068  |
| 6  | 0 | 1.568177  | -1.584513 | 0.000069  |
| 8  | 0 | 1.987415  | 2.662492  | 0.000210  |
| 8  | 0 | 1.987773  | -2.662287 | 0.000212  |
| 30 | 0 | -2.095992 | -0.000080 | -0.000165 |

PBEPBE/6-311+G(3df)

|    |   |           |           |           |
|----|---|-----------|-----------|-----------|
| 30 | 0 | 0.414280  | -0.000004 | 0.000018  |
| 6  | 0 | 1.559030  | 1.588331  | 0.000072  |
| 6  | 0 | 1.559260  | -1.588169 | 0.000073  |
| 8  | 0 | 1.970727  | 2.669743  | 0.000212  |
| 8  | 0 | 1.971118  | -2.669520 | 0.000213  |
| 30 | 0 | -2.089097 | -0.000088 | -0.000160 |

BHandHLYP/6-311+G(3df)

|    |   |           |           |           |
|----|---|-----------|-----------|-----------|
| 30 | 0 | 0.285858  | -0.000068 | 0.000143  |
| 6  | 0 | 1.739643  | 1.467711  | 0.000056  |
| 6  | 0 | 1.739941  | -1.467516 | 0.000059  |
| 8  | 0 | 2.389677  | 2.383977  | 0.000199  |
| 8  | 0 | 2.390206  | -2.383620 | 0.000199  |
| 30 | 0 | -2.256411 | -0.000066 | -0.000272 |

B3LYP/6-311+G(3df)

|    |   |           |           |           |
|----|---|-----------|-----------|-----------|
| 30 | 0 | 0.344436  | -0.000041 | 0.000124  |
| 6  | 0 | 1.676082  | 1.520440  | 0.000004  |
| 6  | 0 | 1.676431  | -1.520211 | 0.000014  |
| 8  | 0 | 2.209400  | 2.529690  | 0.000204  |
| 8  | 0 | 2.209994  | -2.529321 | 0.000204  |
| 30 | 0 | -2.193444 | -0.000103 | -0.000236 |

MP2/6-311+G(3df)

|                     |   |          |           |           |
|---------------------|---|----------|-----------|-----------|
| 30                  | 0 | 0.000000 | 0.000000  | 2.143402  |
| 30                  | 0 | 0.000000 | 0.000000  | -0.279260 |
| 6                   | 0 | 0.000000 | 1.460662  | -1.629054 |
| 8                   | 0 | 0.000000 | 2.409140  | -2.273476 |
| 6                   | 0 | 0.000000 | -1.460662 | -1.629054 |
| 8                   | 0 | 0.000000 | -2.409140 | -2.273476 |
| MP4SDQ/6-311+G(3df) |   |          |           |           |
| 30                  | 0 | 0.000000 | 0.000000  | 2.202909  |
| 30                  | 0 | 0.000000 | 0.000000  | -0.267102 |
| 6                   | 0 | 0.000000 | 1.461083  | -1.687769 |
| 8                   | 0 | 0.000000 | 2.377869  | -2.363811 |
| 6                   | 0 | 0.000000 | -1.461083 | -1.687769 |
| 8                   | 0 | 0.000000 | -2.377869 | -2.363811 |
| QCISD/6-311+G(3df)  |   |          |           |           |
| 30                  | 0 | 0.000000 | 0.000000  | 2.232011  |
| 30                  | 0 | 0.000000 | 0.000000  | -0.269592 |
| 6                   | 0 | 0.000000 | 1.462505  | -1.717507 |
| 8                   | 0 | 0.000000 | 2.377727  | -2.391407 |
| 6                   | 0 | 0.000000 | -1.462505 | -1.717507 |
| 8                   | 0 | 0.000000 | -2.377727 | -2.391407 |
| CCSD/6-311+G(3df)   |   |          |           |           |
| 30                  | 0 | 0.000000 | 0.000000  | 2.239707  |
| 30                  | 0 | 0.000000 | 0.000000  | -0.266717 |
| 6                   | 0 | 0.000000 | 1.461819  | -1.725455 |
| 8                   | 0 | 0.000000 | 2.369100  | -2.405266 |
| 6                   | 0 | 0.000000 | -1.461819 | -1.725455 |
| 8                   | 0 | 0.000000 | -2.369100 | -2.405266 |

### [ZnH<sub>2</sub>] system

#### <sup>1</sup>HZnH (C<sub>∞v</sub>)

|    |   |          |          |           |
|----|---|----------|----------|-----------|
| 30 | 0 | 0.000000 | 0.000000 | 0.000000  |
| 1  | 0 | 0.000000 | 0.000000 | 1.541711  |
| 1  | 0 | 0.000000 | 0.000000 | -1.541711 |

#### <sup>1</sup>TS (C<sub>s</sub>)

|    |   |           |           |          |
|----|---|-----------|-----------|----------|
| 30 | 0 | 0.000000  | 0.094262  | 0.000000 |
| 1  | 0 | 0.829534  | -1.175160 | 0.000000 |
| 1  | 0 | -0.829534 | -1.652713 | 0.000000 |

#### <sup>3</sup>HZnH (C<sub>2v</sub>)

|    |   |           |           |          |
|----|---|-----------|-----------|----------|
| 30 | 0 | 0.000000  | 0.090983  | 0.000000 |
| 1  | 0 | -0.911409 | -1.364740 | 0.000000 |
| 1  | 0 | 0.911409  | -1.364740 | 0.000000 |

| ${}^3\text{TS} (\text{C}_s)$ |   |           |           |          |
|------------------------------|---|-----------|-----------|----------|
| 30                           | 0 | 0.000000  | 0.103793  | 0.000000 |
| 1                            | 0 | 0.513213  | -1.556825 | 0.000000 |
| 1                            | 0 | -0.513213 | -1.556955 | 0.000000 |

  

| ${}^3\text{Zn}\cdots\text{H}_2 (\text{C}_{2v})$ |   |          |           |           |
|-------------------------------------------------|---|----------|-----------|-----------|
| 30                                              | 0 | 0.000000 | 0.000000  | 0.106901  |
| 1                                               | 0 | 0.000000 | 0.466466  | -1.603522 |
| 1                                               | 0 | 0.000000 | -0.466466 | -1.603522 |

### Chemical bonding analysis

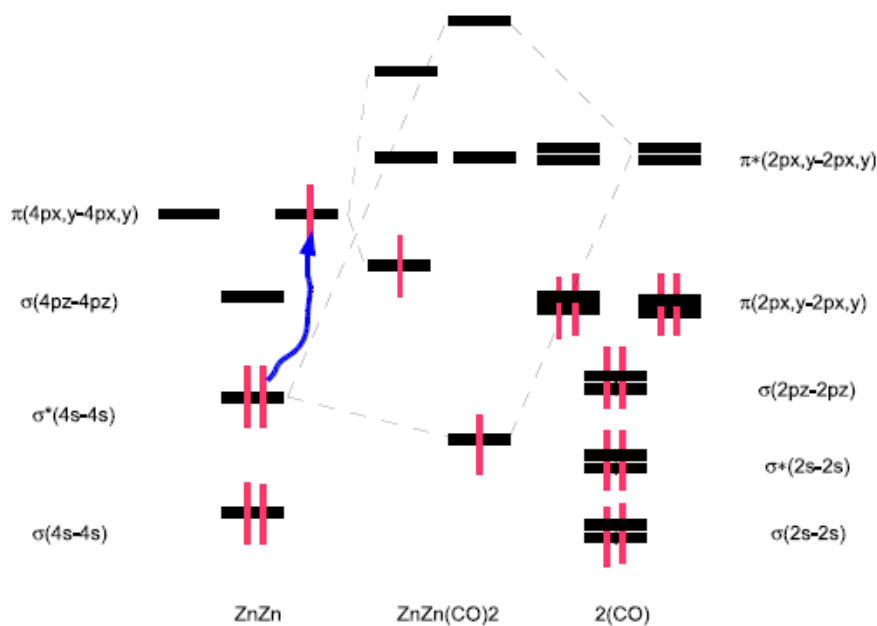

**Figure S1:** Schematic representation of the valence molecular orbitals of the  ${}^3\text{B}_1$  ground state of  ${}^3(\text{CO})_2\text{ZnZn}$ .

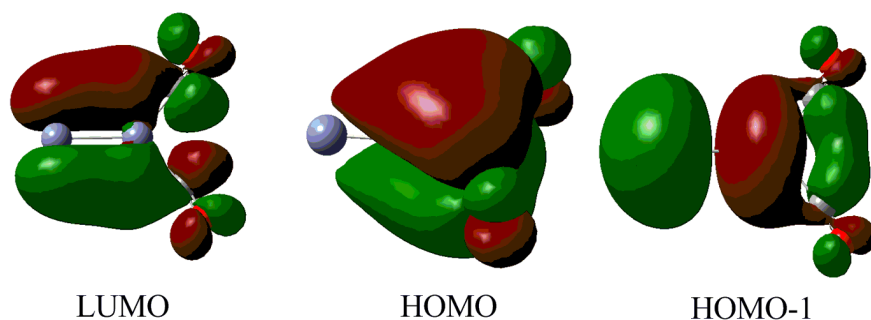

**Figure S2:** The pictures of characteristic orbitals of ground state of  ${}^3(\text{CO})_2\text{ZnZn}$ .

As shown in **Figure S1**, the fragments selected are the zinc dimer,  $Zn_2$ , and the two carbonyl ligands. Bonding is then depicted as arising from an excitation of one of the electrons of the antibonding  $\sigma^*(4s - 4s)$  orbitals of the zinc dimer to one the excited  $\sigma^*(4py - 4py)$  bonding orbitals, being the  $y$ -axis the one perpendicular to the molecular plane of  ${}^3(CO)_2ZnZn$ . Then, this orbital and the  $\sigma^*(4s-4s)$  orbitals mix with the  $\sigma^*(2py-2py)$  of the carbonyls to form the singly occupied molecular orbitals that give rise to the triplet  ${}^3B_1$  ground state of  ${}^3(CO)_2ZnZn$ . The singly occupied orbitals are shown in **Figure S2**.
